# Supplementary material for: Assembly of cyanometalate-functionalized phosphotungstates with magnetic properties and bifunctional electrocatalytic activities
Source: Royal Society of Chemistry journal article supplement (doi:10.1039/c4dt03447c), 2015-01-01
Supplement: c4dt03447c1.pdf [file c4dt03447c1.pdf]

## Supporting information

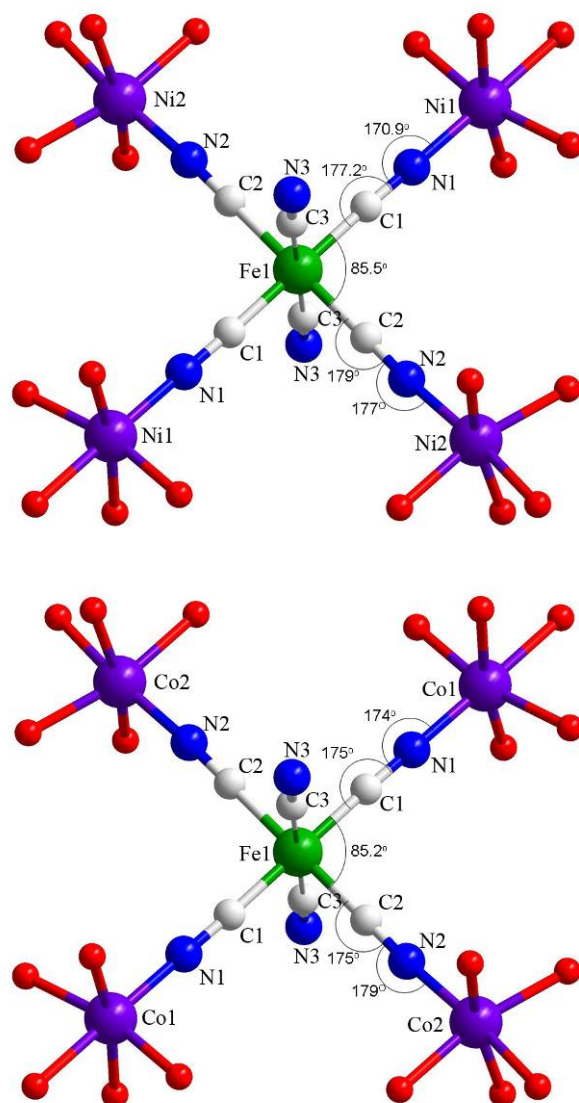

**Fig. S1.** ball-and-stick representation of the  $[\text{Fe}^{\text{III}}_2\text{Mn}^{\text{II}}_2\text{Fe}(\text{CN})_6]$  unit in **1**(top) and **2** (down) (O-red).

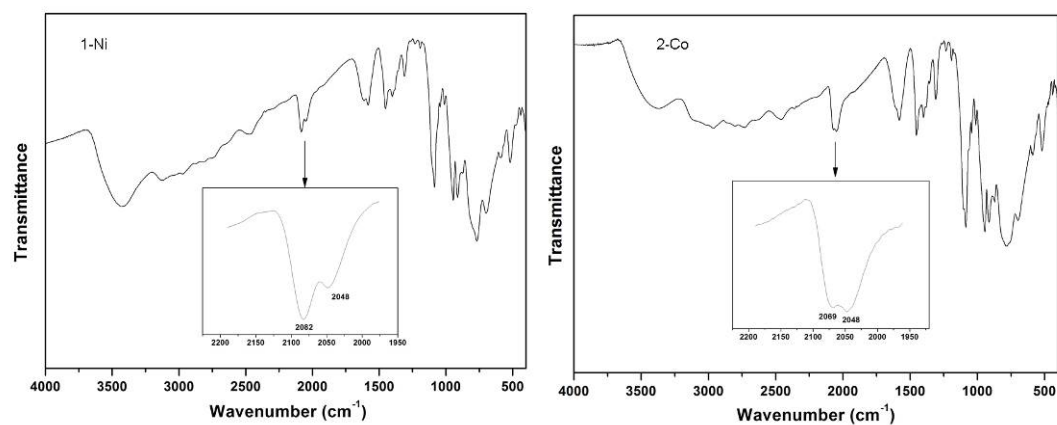

**Fig. S2** IR of spectra of **1** and **2**

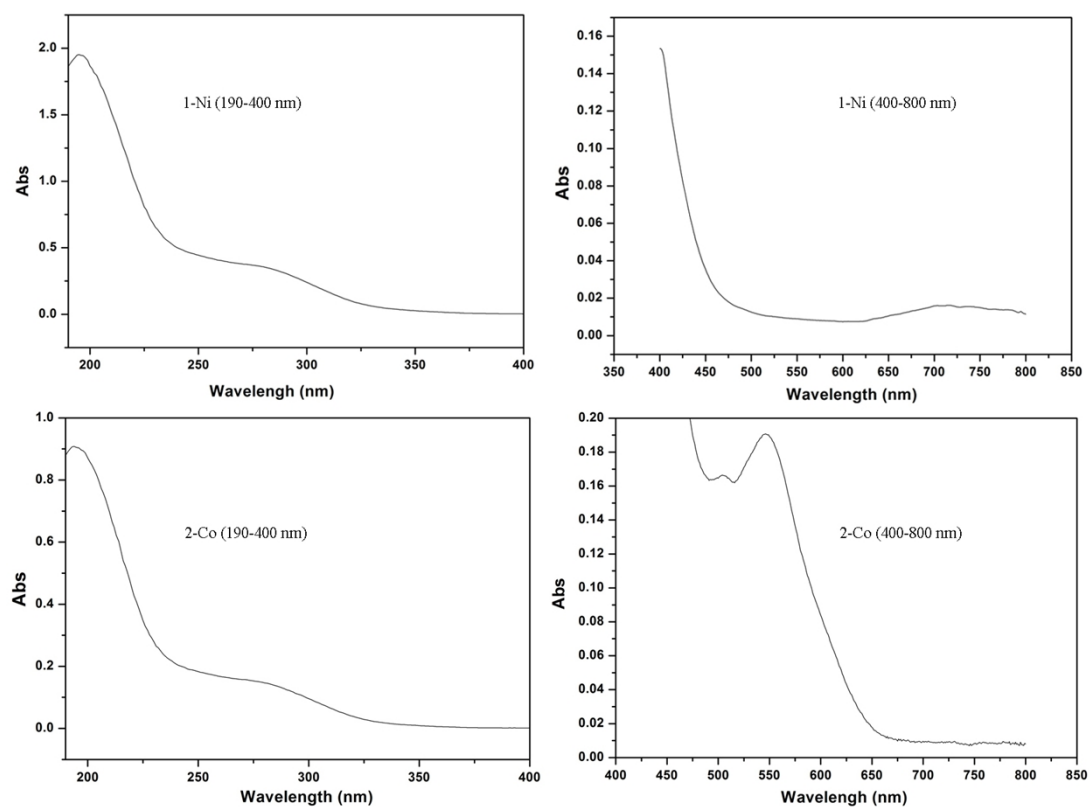

**Fig. S3.** Electronic absorption spectra of **1** and **2**. Two absorption bands at 195 nm, 287 nm for **1** and 194 nm, 282 nm for **2** is assigned to the charge transfer transition of  $O_t \rightarrow Mo$  and  $O_{b,c} \rightarrow Mo$ . The peaks at 720 nm for **1** and 546 nm for **2** are assigned to transition metal ions to POM ligand charge transfer.

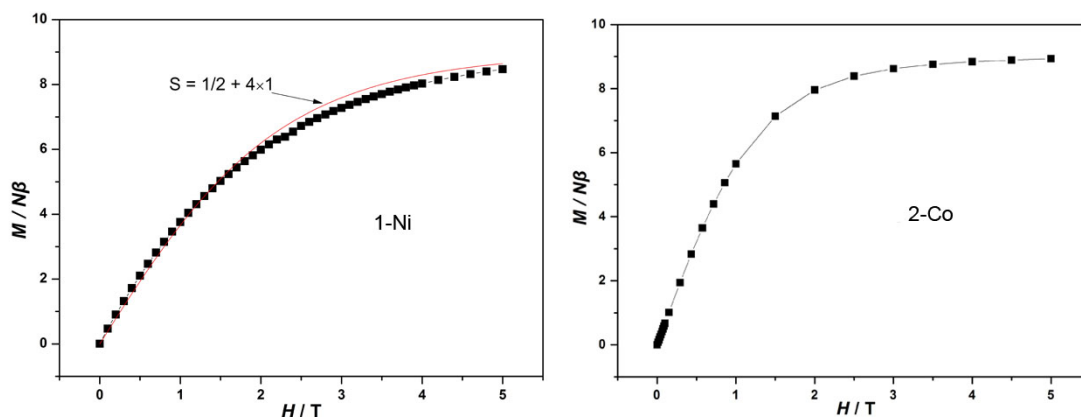

**Fig. S4.** Field dependence of magnetization of **1** (left) and **2** (right) at 2 K. For **1**, the solid line represents the Brillouin function that corresponds to non-interacting  $S = 1 \times S_{\text{Fe}} + 4 \times S_{\text{Ni}}$  with  $g = 2.0$ .

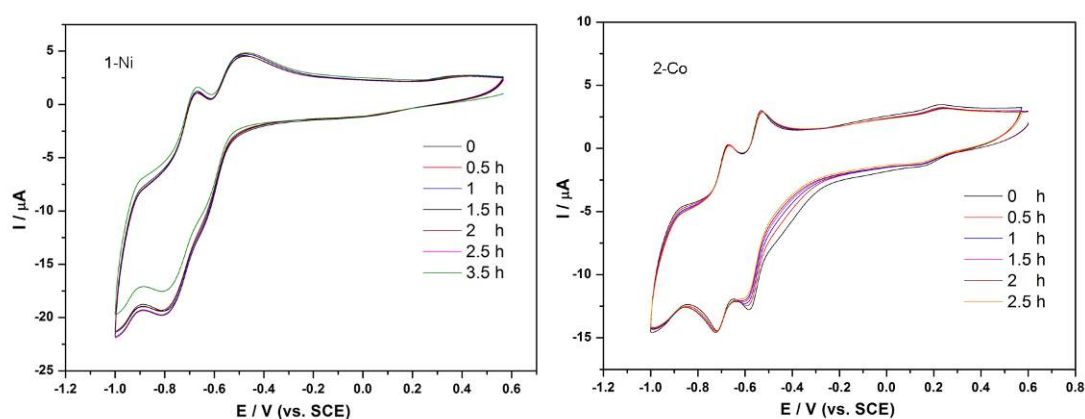

**Fig. S5.** Cyclic voltammograms of compounds **1** and **2** in 0.2 M  $\text{NaH}_2\text{PO}_4$ - $\text{Na}_2\text{HPO}_4$  buffer solution ( $\text{pH} = 6.2$ ) taken at different times.

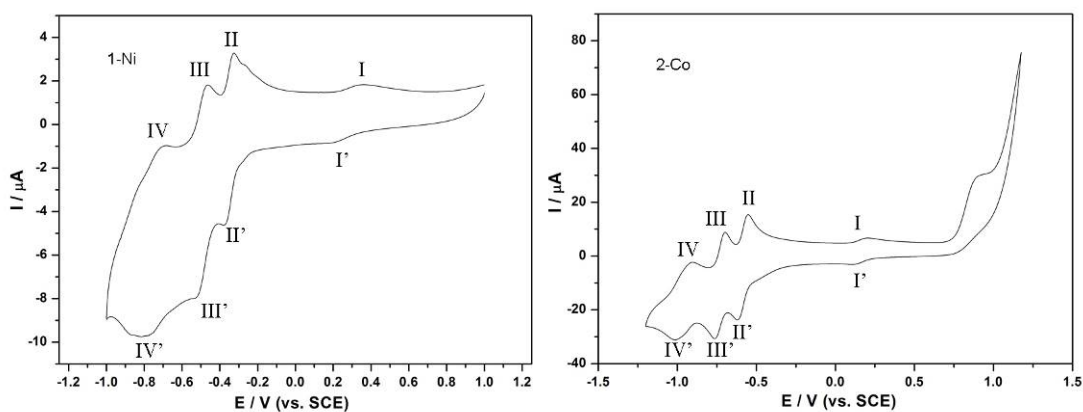

**Fig. S6.** Cyclic voltammograms of compounds **1** and **2** in 0.2 M  $\text{NaH}_2\text{PO}_4$ - $\text{Na}_2\text{HPO}_4$  buffer solution ( $\text{pH} = 6.2$ ) at a scan rate of 50 mV/s

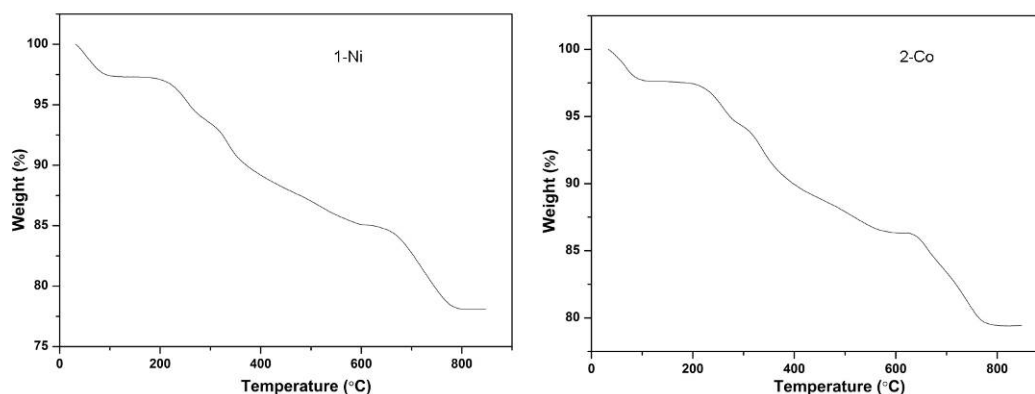

**Fig. S7.** The TG curve of complex **1** and **2**.

For **1**, it shows three steps of weight loss. The first loss of 2.69% (calc 2.62%) in the temperature range of 33-129 °C, could be assigned to the loss of lattice water. The second and third weight loss of 19.09% (calc 17.95%) in the temperature range of 164-800 °C, corresponds to the loss of organic moieties, together with the decomposition of  $[\text{Ni}^{\text{II}}_4\text{Fe}^{\text{III}}(\text{CN})_6]^{5+}$  fragment. For **2**, in the temperature range of 31.5-115.5 °C, the first loss of 2.38% (calc 2.30%) is assigned to the loss of lattice water. The second and third weight loss of 18.20% (calc 17.43%) in the temperature range of 178-805.5 °C could be ascribed of the loss of organic moieties, the decomposition of  $[\text{Co}^{\text{II}}_4\text{Fe}^{\text{III}}(\text{CN})_6]^{5+}$  fragment.

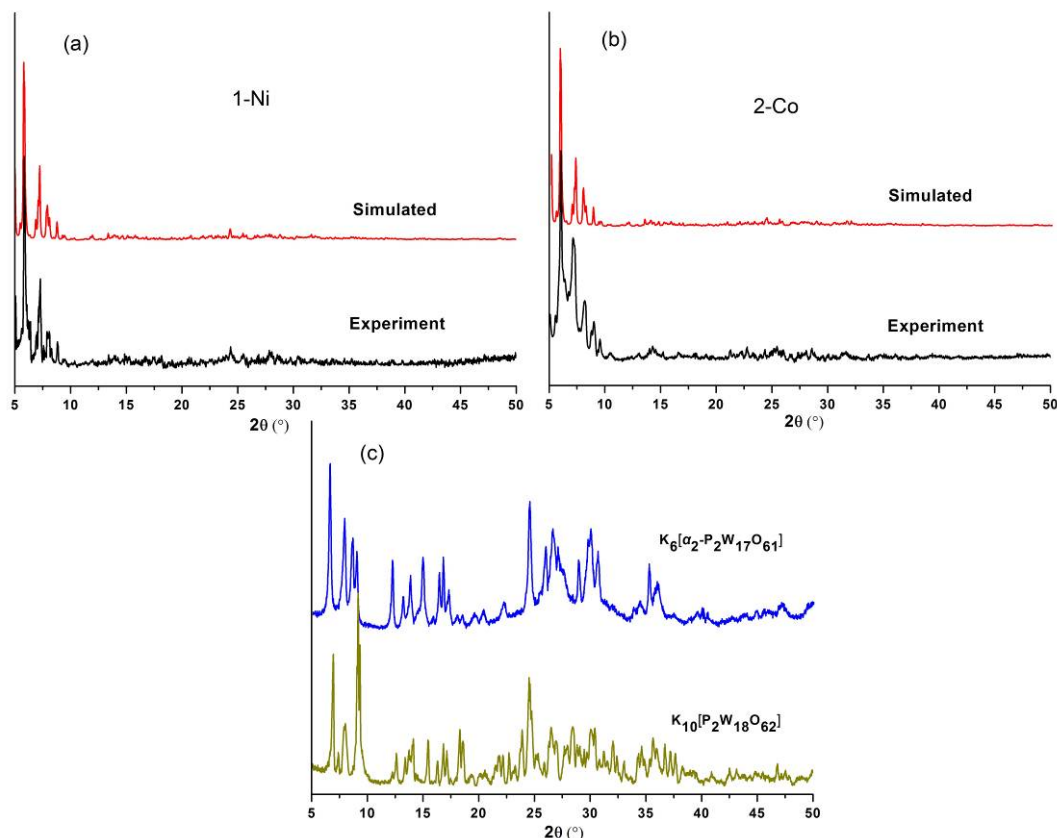

**Fig. S8.** Powder XRD pattern of **1** (a) and **2** (b) (black line) and simulated powder XRD pattern from data collected from a single crystal of **1** and **2** (red line) through the program ‘Mercury’. (c) Powder XRD pattern of the material  $K_6[\alpha_2-P_2W_{17}O_{61}]$  and  $K_{10}[P_2W_{18}O_{62}]$ . The experimental XRD patterns are in good agreement with the simulated XRD patterns, demonstrating the good phase purity for **1** and **2**. The differences in intensity between the experimental and simulated XRD patterns might be due to the variation in preferred orientation of the powder sample during collection of the experimental XRD.<sup>[1]</sup>

[1] J. Wang, J. W. Zhao, H. Y. Zhao, B. F. Yang, H. He and G. Y. Yang, *CrystEngComm*, 2014, **16**, 252-259.

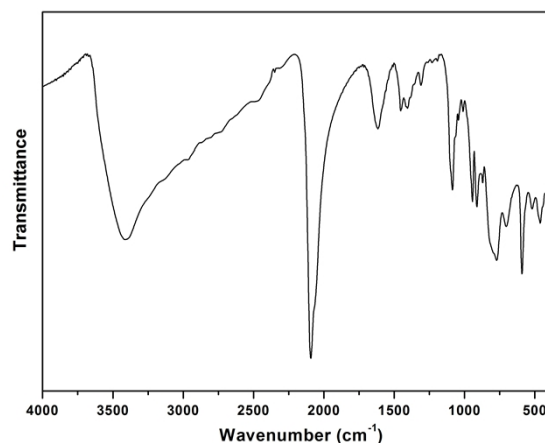

**Fig. S9.** The IR of the precipitate formed after the reactants were mixed, which are

proved to be a mixture of Prussian blue analogues and mono-metal-substituted POMs ( $[\text{P}_2\text{W}_{17}\text{MO}_{61}]^{8-}$ ). These by-products result in the low yields of **1** and **2**.

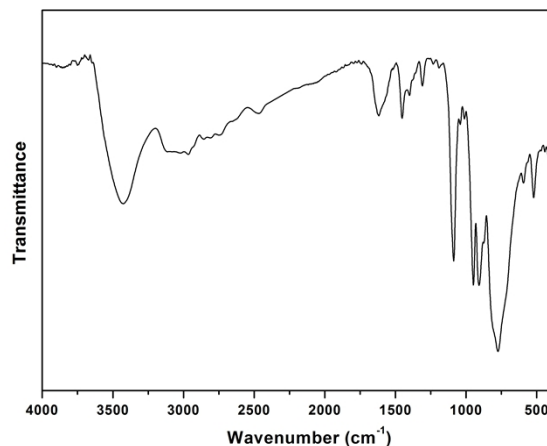

**Fig. S10.** The IR of the by-produce powders of mono-metal-substituted POMs without cyanometalate linker ( $[\text{P}_2\text{W}_{17}\text{MO}_{61}]^{8-}$ ). The reaction solution was stillly evaporated at room temperature after no target produce being isolated and the powder of by-produce was formed.
